# Supplementary material
Source: publisher figshare collection journal article supplement (https://tandf.figshare.com/articles/dataset/_/9937934)
Supplement: Supplementary file 1 [file 1]

Archive with 6 entries (6 files):
- Figure_S1[1].tif
- Figure_S2[1].tif
- Figure_S3[1].tif
- Figure_S4[1].tif
- Figure_S5[1].tif
- icts_a_1655003_sm2704.pdf
