# Supplementary material
Source: publisher figshare collection journal article supplement (https://tandf.figshare.com/articles/dataset/_/9937934)
Supplement: Supplementary file 1 [file 1 › icts_a_1655003_sm2704.pdf]

Supporting Information

**Development and characterization of waste equine bone-derived calcium phosphate cements with human alveolar bone-derived mesenchymal stem cells**

Kyung-Je Jang<sup>1,†</sup>, Hoon Seonwoo<sup>2,†</sup>, Minho Yang<sup>1</sup>, Ki Taek Lim<sup>3</sup>, Jangho Kim<sup>4</sup>,  
Pill-Hoon Choung<sup>5</sup>, Jong Hoon Chung<sup>1, 6, \*</sup>

*<sup>1</sup>Department of Biosystems & Biomaterials Science and Engineering, Seoul National University, Seoul, 151-742, Republic of Korea.*

*<sup>2</sup>Department of Industrial Machinery Engineering, College of Life Science and Natural Resources, Sunchon National University, Sunchon 57922, Republic of Korea*

*<sup>3</sup>Department of Biosystems Engineering, College of Agricultural and Life Sciences, Kangwon National University, Chuncheon 200-701, Republic of Korea*

*<sup>4</sup>Department of Rural and Biosystems Engineering, Chonnam National University, Gwangju 500-757, Republic of Korea*

*<sup>5</sup>Department of Oral and Maxillofacial Surgery and Dental Research Institute, School of Dentistry, Seoul National University, Seoul 110-774, Republic of Korea*

*<sup>6</sup>Research Institute of Agriculture and Life Sciences, Seoul National University, Seoul, Korea*

<sup>†</sup>These two authors contributed equally to this study.

### ***Thermogravimetric study***

To evaluate the protein contents in the thermally treated equine bone powder, measurement procedure of mass change by pyrolysis was conducted, commonly implemented methods for xenogenous bone graft in Korea by guided from Food & Drug Administration (KFDA). The EB powder was prepared 500 mg ( $m_1$ ), and heat treated via electric furnace at 1000 °C in normal atmosphere for 12 h. The cooled EB powder weight ( $m_2$ ) was measured. The ratio of pyrolysis weight (R) was calculated following equation:

$$R = \frac{m_1 - m_2}{m_1} \times 100 \text{ (\%)}$$

### ***X-ray diffractometry (XRD)***

The crystalline phases in the hydroxyapatite (HA) and tricalciumphosphate (TCP) were detected using an X-ray diffractometer (New D8 Advanced XRD, Bruker, Germany) with Cu-K $\alpha$  radiation at 40 kV and 40 mA. The samples were scanned at 3° to 55° using steps of 2 $\theta$  and a counting time of 60 s per step. The crystalline phase compositions were identified with reference to the standard JCPDS cards that were available in the system software.

### ***Multipotent characterization***

The isolated stem cells were cultured in 12 well culture plate at 37 °C and 100 % humidity with 5 % CO<sub>2</sub> in  $\alpha$ -minimal essential medium ( $\alpha$ -MEM) supplemented with 10 % fetal bovine serum (FBS, Hyclone, USA), 1 % antibiotic, and 1 % ascorbic acid (Sigma Aldrich, St. Louis, MO, USA). The medium was changed every 2 days. When the cells reached 90 % confluence, the differentiation potential of the isolated stem cells was cultured under conditions that were appropriate for osteogenic, neurogenic, adipogenic, and differentiation for 2 weeks. The four types of differentiation induction medium - osteogenic, neurogenic, adipogenic, angiogenic (PromoCell, Heidelberg,

Germany) - was changed every 2 days. After 2 weeks, the medium was removed, and wash two times briefly with PBS. For fixation of cells, the 0.5 % paraformaldehyde was treated for 30 min at 25 °C. For alizarin red S staining, the fixed cells were incubated with 0.5 % Alizarin red S (Sigma, St. Louis, MO) solution at room temperature 20 min, wash briefly twice with PBS. For nissle staining, the fixed cells were incubated with 0.5 % crysel violet (Sigma Aldrich, St. Louis, MO, USA) solution at room temperature. wash briefly twice with PBS. For oil red O staining, the fixed cells were incubated with 0.5 % Oil red O (Sigma-aldrich, St. Louis, MO) solution at room temperature. wash briefly twice with PBS. For alcian blue staining, the fixed cells were incubated with 0.5 % alcian blue (Sigma Aldrich, St. Louis, MO, USA) solution at room temperature. wash briefly twice with PBS. Measurement of protein content

Figure S1. Characterization of heat treatment of equine bone. (a) FT-IR results of equine bone before and after heat treatment. (b) TGA results of equine bone specimen. (c) Weight loss ratio ( $m_2/m_1 \times 100$  (%)) of equine bone powder after thermal treatment at 1200 °C. ( $m_1$ : initial weight of equine bone powder,  $m_2$ : after thermal treatment at 1200 °C for 12 h weight of equine bone powder)

Fig. S2. XRD analysis of the TCP and HA.

Fig. S3. Characteristics of DPSCs and PDLSCs. (A) Cell viability results for the DPSCs and PDLSCs on the EB-CPCs. The cell viabilities of the hABMSCs were measured at an absorbance of 450 nm (error bars indicate standard deviations,  $n = 3$ ). \* indicates a significant difference ( $p < 0.05$ ). (B) Alkaline phosphatase (ALP) activities of the DPSCs and PDLSCs on the EB-CPCs. Osteogenic media were used for 7 and 14 days (error bars indicate standard deviations,  $n = 3$ ). \* indicates significant difference ( $p < 0.05$ ).

Figure S4. Evaluation of multilineage potential of hABMSCs, DPSCs, and PDLSCs. The cells were cultured for 1 and 14 days under the differentiating condition to each lineage. Calcium deposits in the culture plate were stained using Alizarin red O staining of each cells. Cresyl violet staining for evaluation neurogenic differentiation was conducted to each cells. Oil red O staining for evaluation adipogenic differentiation was conducted to each cells. Each cells were stained with Alcian blue for evaluation chondrogenic differentiation.
