# Supplementary material
Source: publisher figshare collection journal article supplement (https://tandf.figshare.com/articles/dataset/_/9937934)

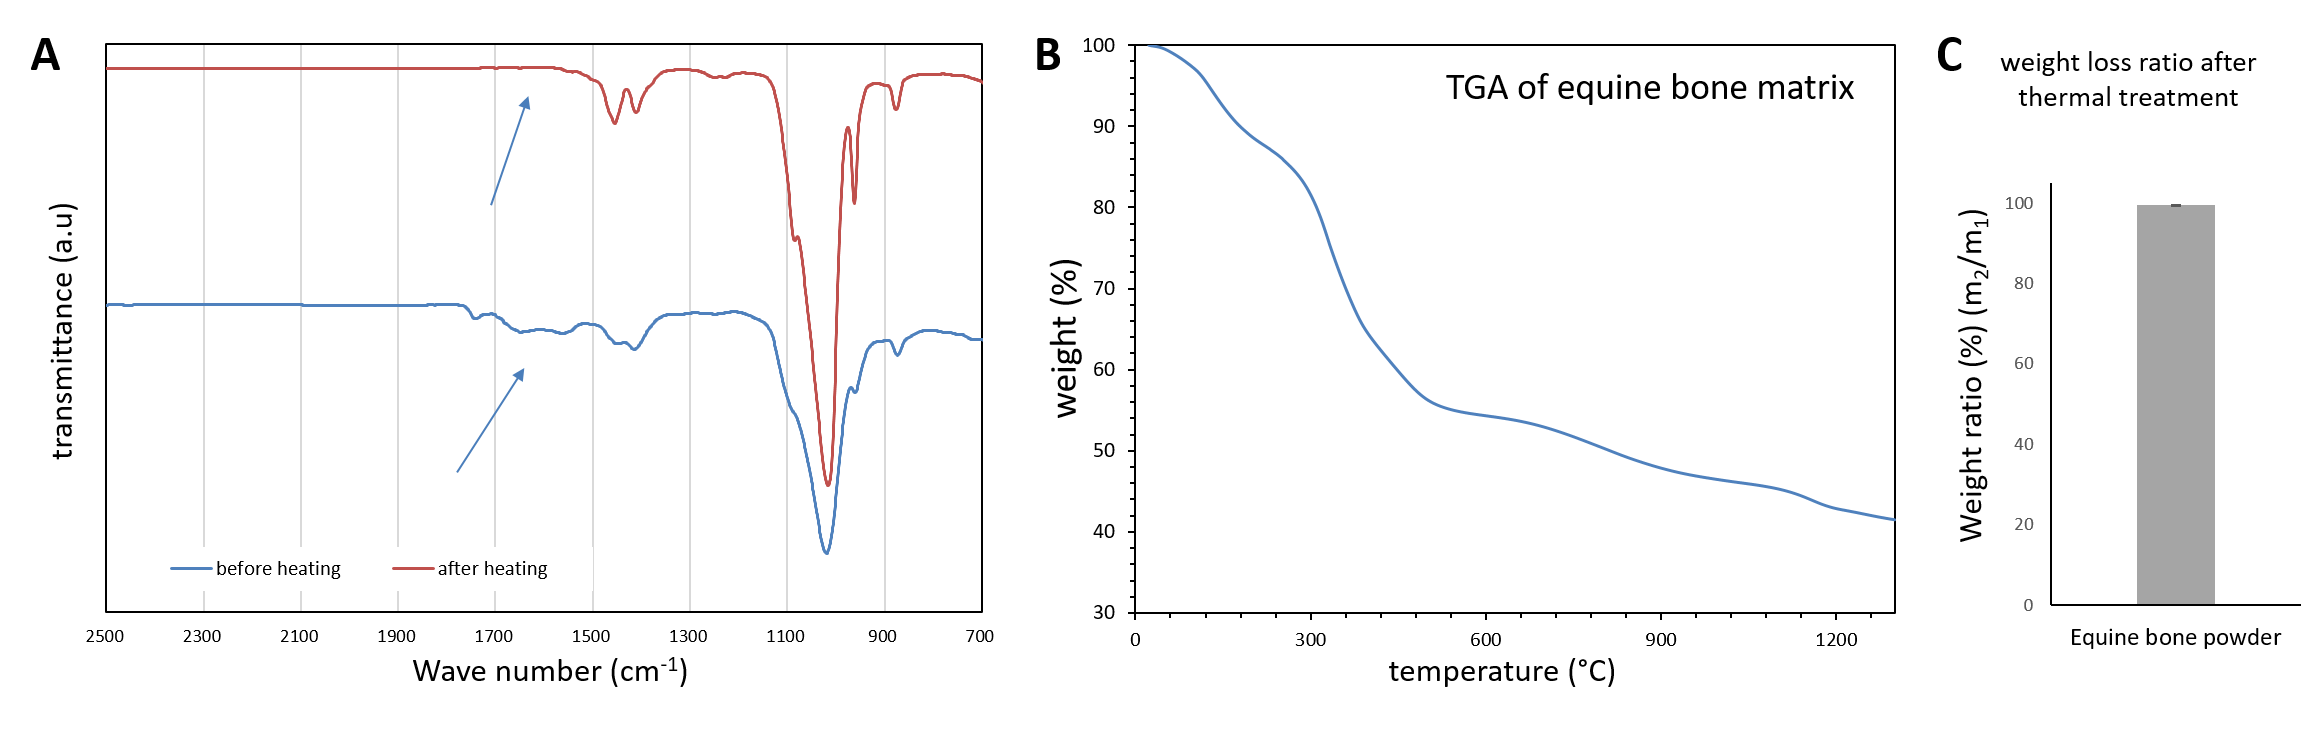

Supplement: Supplementary file 1 [file 1 › Figure_S1[1].tif]

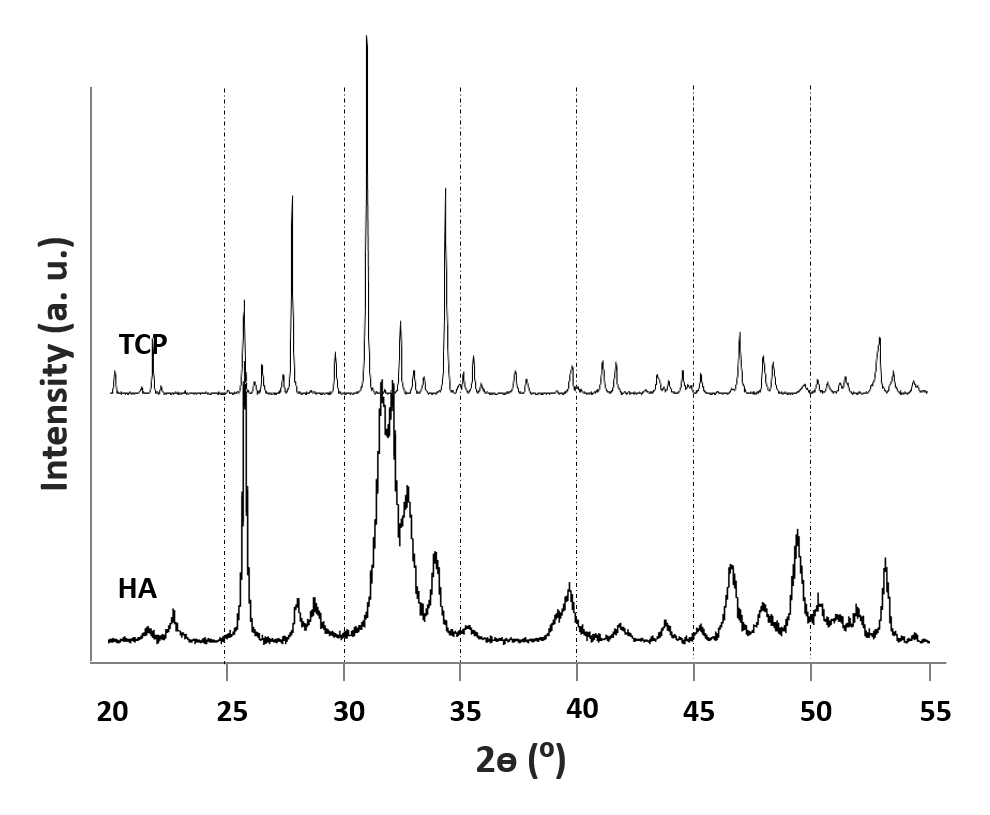

Supplement: Supplementary file 1 [file 1 › Figure_S2[1].tif]

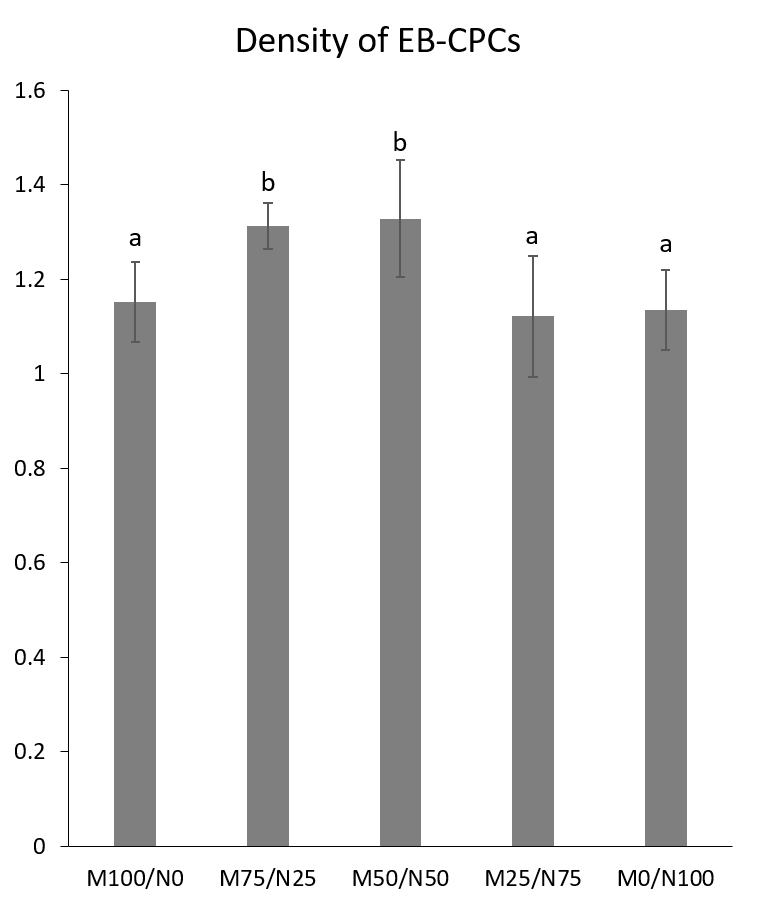

Supplement: Supplementary file 1 [file 1 › Figure_S3[1].tif]

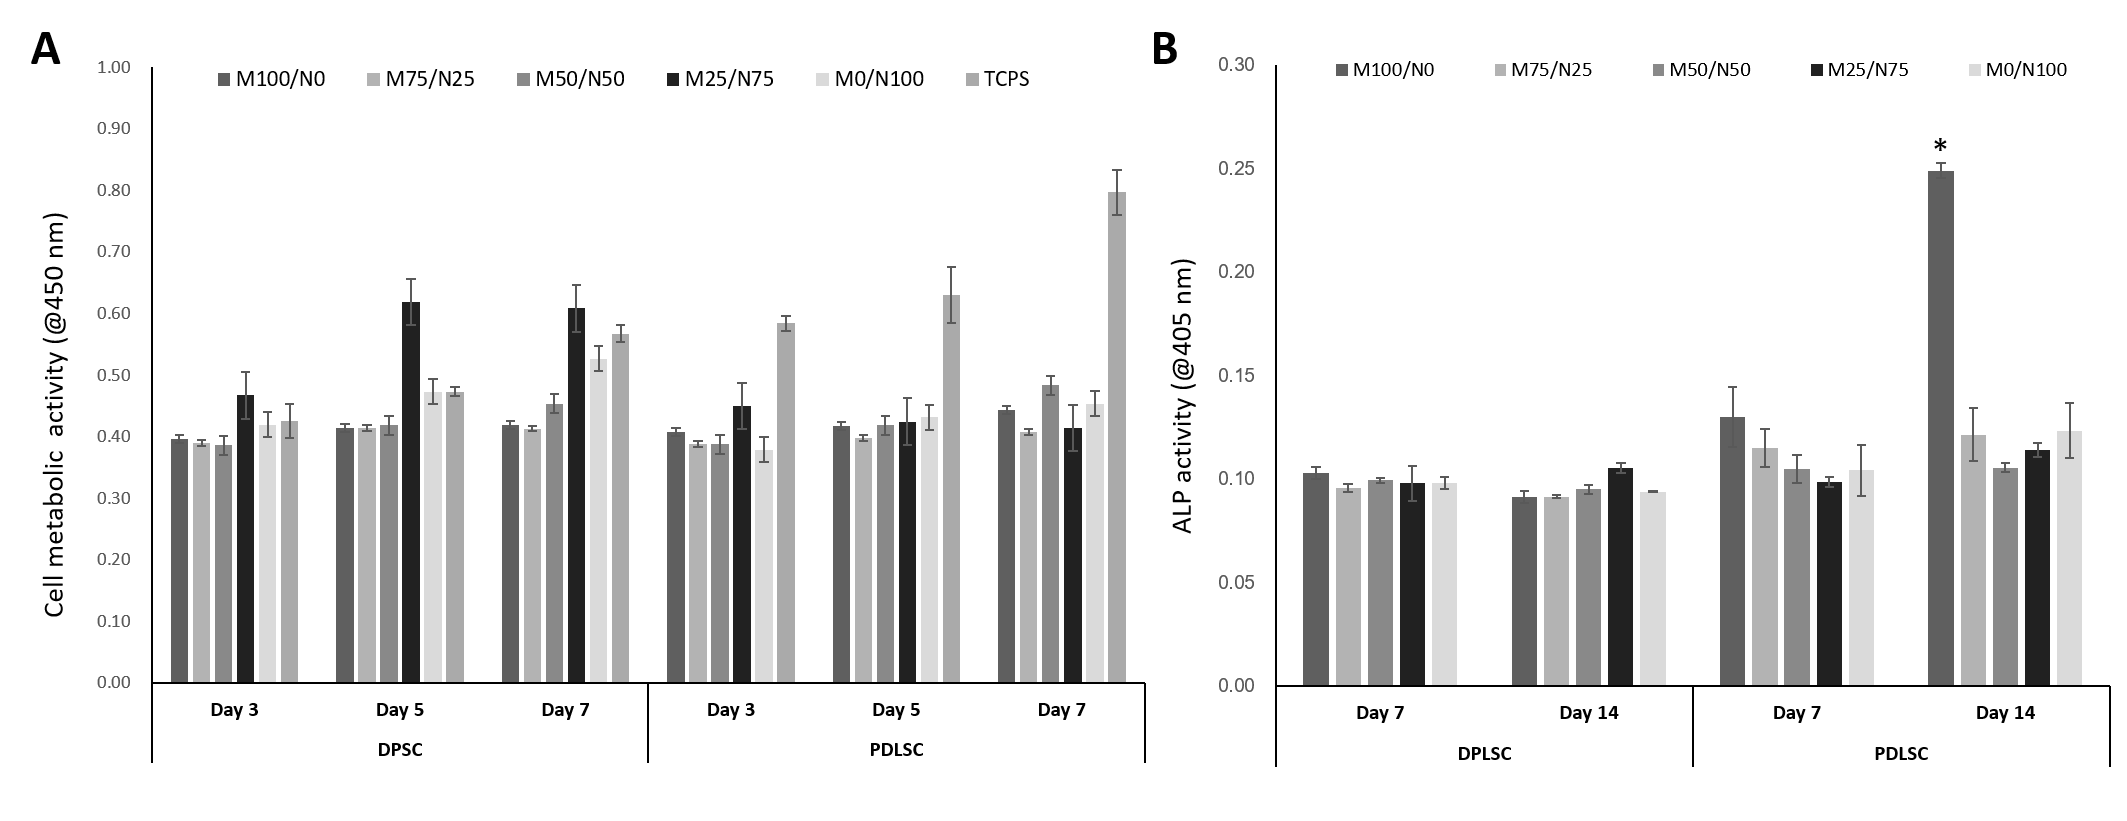

Supplement: Supplementary file 1 [file 1 › Figure_S4[1].tif]

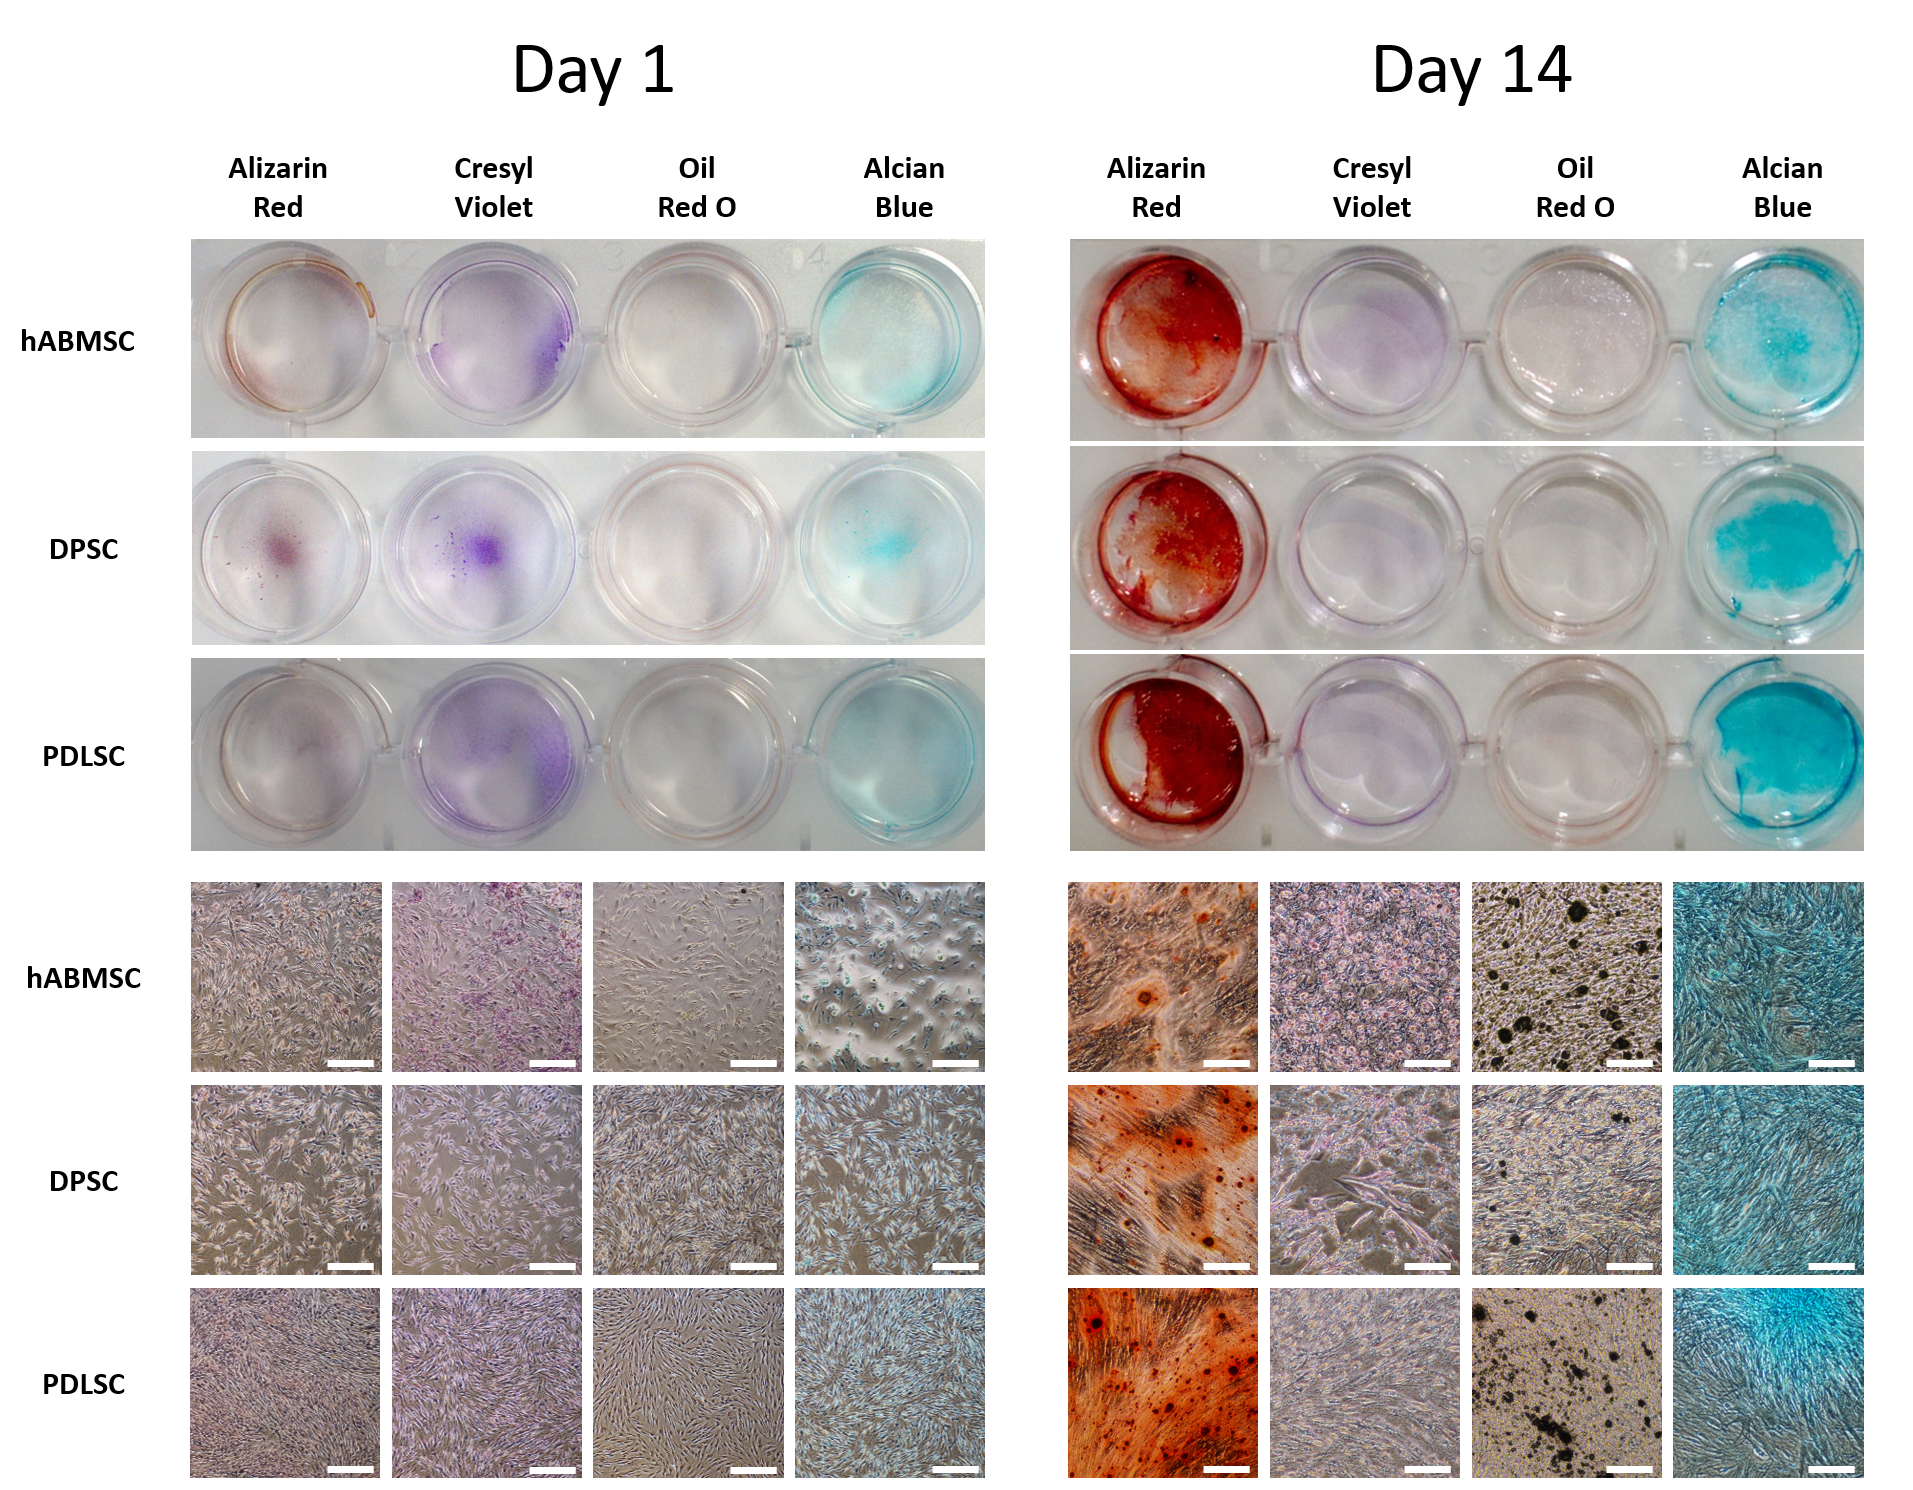

Supplement: Supplementary file 1 [file 1 › Figure_S5[1].tif]
